# Supplementary material for: The Relationship Between Insulin Resistance and Incidence and Progression of Coronary Artery Calcification
Source: Oxford University Press journal article supplement (doi:10.2337/dc10-1681), 2011-02-04
Supplement: dc101681supplementarydata.pdf [file dc101681supplementarydata.pdf]

SUPPLEMENTARY DATA

**Table 1 or Supplementary Table. HOMA quartile for the prediction of CAC incidence and progression in the Multi-Ethnic Study of Atherosclerosis.**

|                                     | <b>Model 1</b>              | <b>Model 2</b>     | <b>Model 3</b>     |
|-------------------------------------|-----------------------------|--------------------|--------------------|
| <b>Incident CAC</b>                 |                             |                    |                    |
| <i>Relative Risk (95% CI)</i>       |                             |                    |                    |
| ▪ HOMA Q1                           | 1 (ref)                     | 1 (ref)            | 1 (ref)            |
| ▪ HOMA Q2                           | 1.24 (0.98 – 1.56)          | 1.10 (0.87 – 1.41) | 1.04 (0.81 – 1.32) |
| ▪ HOMA Q3                           | <b>1.53 (1.23 – 1.91)**</b> | 1.20 (0.94 – 1.54) | 1.06 (0.82 – 1.37) |
| ▪ HOMA Q4                           | <b>1.78 (1.32 – 2.22)**</b> | 1.21 (0.92 – 1.61) | 1.02 (0.77 – 1.35) |
|                                     |                             |                    |                    |
| <b>CAC Progression†</b>             |                             |                    |                    |
| <i>Δ Volume score/year (95% CI)</i> |                             |                    |                    |
| ▪ HOMA Q1                           | 1 (ref)                     | 1 (ref)            | 1 (ref)            |
| ▪ HOMA Q2                           | 3.9 (-3.3 – 11.0)           | -0.7 (-8.2 – 6.7)  | 3.2 (-3.6 – 10.0)  |
| ▪ HOMA Q3                           | <b>9.0 (1.9 – 16.1)*</b>    | -0.3 (-8.2 – 7.6)  | 5.1 (-2.2 – 12.4)  |
| ▪ HOMA Q4                           | <b>11.5 (4.5 – 18.4)**</b>  | -3.0 (-11.8 – 5.8) | 5.0 (-3.4 – 13.4)  |

**HOMA quartiles:** 1<sup>st</sup> quartile (0.14 – 0.79), 2<sup>nd</sup> quartile (0.80 – 1.24), 3<sup>rd</sup> quartile (1.24 – 2.03), 4<sup>th</sup> quartile (>2.03)

**Model 1** = Adjusted for age, gender, race/ethnicity, MESA site, years between CAC scans

**Model 2** = Model 1 + NCEP ATPIII metabolic syndrome components (waist circumference, impaired fasting glucose, low HDL-C, high triglycerides, hypertension [categorical])

**Model 3** = Model 1 + NCEP ATPII metabolic syndrome components (continuous) except for impaired fasting glucose (categorical), diabetes, smoking, LDL-C, family history of CHD, cholesterol-lowering medications

† Additionally adjusted for log (baseline CAC) in the CAC progression model

\* p<0.05

\*\* p<0.005
